# Supplementary material for: Experimental and Numerical investigation on Pile Foundation Underpinning Structure System in Urban Overpass
Source: Preprints.org preprint supplement (doi:10.20944/preprints202309.0900.v1), 2023-09-14
Supplement: Supplementary file 1 [file supplementary]

Response to Reviewer 2 Comments

Dear reviewer,

Thanks very much for taking the time to review this manuscript. We really appreciate all your comments and suggestions! Our responses to comments are given in a different color (red), and the added contents in the manuscript in green. We would also like to thank you for allowing us to resubmit a revised version of the manuscript. Please kindly find our itemized point-to-point responses below.

1. The paper needs to be proofread again. Also, add line numbers.

**Response 1:**

**Thank you for pointing out this important issue. We have proofread the manuscript again and added line numbers in the revised manuscript.**

2. The introduction provides a solid context, but additional background on the challenges associated with pile foundation underpinning systems and their significance to urban infrastructure projects would enhance the reader's understanding. Several points related to experimental or theoretical research were not described in detail. No relevant studies were elaborated for the numerical simulation part of the text. It should at least be mentioned in the structure of the article. Please sub-focus in paragraphs and rewrite this section, adding a table if necessary.

**Response 2:**

**We thank the reviewer for raising this valuable comment. We have revised the manuscript's introduction and added more comprehensive previous studies on pile foundation replacement, including the challenges associated with pile foundation underpinning systems and their significance to urban infrastructure projects, experimental or theoretical researches, and numerical simulation studies on the challenges associated with pile foundation underpinning systems and their significance to urban infrastructure projects. The added contents are as follows:**

**Paragraph 1-4 of capture 1, page 1-4, lines 31-197**

*With the acceleration of urbanization, urban rapid rail transit systems, represented by subway tunnels, have been extensively constructed. However, due to the rapid growth in the number of urban structures, situations involving the construction of new bridges or subway tunnels near or through existing buildings have become increasingly common. In order to ensure the safety of the upper structures, pile foundation replacement technology is often employed to transfer the superimposed loads from existing piles, ensuring the smooth progress of new construction projects [1-6]. Pile cap replacement technology is an effective construction technique that involves the creation of a new replacement beam and replacement piles to efficiently transfer the existing load-bearing system. This process redirects the loads previously borne by the existing piles onto the newly constructed replacement piles, effectively managing the stresses and deformations in the existing upper structure [7-9].*

*As urban underground construction continues to grow rapidly, the significance of pile foundation replacement construction technology for urban development becomes increasingly prominent. The pile foundation underpinning technology was first applied to Winchester Cathedral in the United Kingdom. Divers dig a trench through the peat and chalk layers to access the gravel layer, then fill it with concrete to carry out underpinning construction [10]. Germany has conducted several theoretical and practical investigations into pile foundation underpinning technology since the 1950s, employed this technology in numerous projects, and included pile foundation underpinning technology in its industrial standard (DIN) [11–12]. Shan et al. [13] conducted pile underpinning research on an actual building, and the results indicated that the piles acted well as an underpinning role in transferring structure load into surrounding geomaterials, which may offer enough support for the rebuilt structure. Xu et al. [14-15] based on the engineering background of shield tunnel crossing through group pile foundation of a road bridge with pile underpinning technologies in Shanghai verified the feasibility of pile underpinning technology to solve this problem. Li et al. [16] investigated stress transfer mechanism during underpinning process by conducting the refined numerical simulation of the pile foundation underpinning construction using FLAC3D, and found that pile foundation underpinning technology could effectively transferred the overlying load on the underpinning pile to a new underpinning pile. That confirmed the significance of pile foundation displacement construction technology to urban infrastructure projects.*

*There are numerous factors that influence the safety of pile foundation replacement beam construction. Employing appropriate construction methods and effective safety control measures are essential safeguards for pile foundation replacement beam construction technology. In this regard, scholars both domestically and internationally have conducted extensive research. Li et al. [17], Dong et al. [18], Wang [19] and Huang et al. [20] investigated the mechanical performance of replacement piles under replacement loads and proposed a method for predicting the pile's bearing capacity. Huang Xi et al. [21], by analyzing the transfer of replacement loads, the settlement patterns of pile foundations when t tunnel traverses the pile foundation of flyover, and the impact of design parameters on the safety of pile foundation replacement construction, have found that active replacement is superior to passive replacement. Furthermore, they observed a positive correlation between the pile length, pile diameter, replacement beam height, and the safety of the pile underpinning replacement structure.* *Through the orthogonal experiment of scaled models of the wrap-underpinning joints under frame columns in moving engineering, Zhang et al. [22] investigated the influences of the shear-span ratio, longitudinal reinforcement parameter, and stirrup ratio in the underpinning joint surface on the orthogonal experiment of scaled models of the wrap-underpinning joints under frame columns. They also provided the formula to calculate the bearing capacity of underpinning joints.* *Xu et al. [15] conducted a seismic analysis of pile foundation replacement structures to elucidate the load transfer mechanism of bridge structures throughout the entire construction process. Meanwhile, Zhang et al. [23] established a numerical simulation model that accounted for the entire foundation replacement structure and construction steps to validate the feasibility of the pile foundation replacement construction scheme. Yue et al. [24] tested sixteen prototypes considering different shear span-to-depth ratios, underpinning joint heights, and reinforcement ratios and discovered that the underpinning beams can fail in shear or flexure-shear. During loading, the interface between the column and the beam would also be prone to failure. Yan et al. [25] studied the shear and slide characteristics of the joint and developed a revised method for determining shear capacity using three local node models of the underpinning structures with a similarity ratio of 1/1.* *Horpibulsuk et al. [26], Wang et al. [27], Kou. [28] Tu et al. [29] and Igba U.T. et al. [30] proposed an optimized pile cap replacement construction scheme based on practical engineering applications.* *The aforementioned research has elucidated the key factors affecting pile foundation replacement beam construction technology, including pile foundations, replacement beams, and replacement piles. It has also proposed relevant computational models, laying a solid foundation for the practical application of pile foundation replacement beam systems and paving the way for further exploration in novel pile foundation replacement techniques.*

*However, there is a notable lack of research addressing the issue of the connection between newly cast replacement beams and existing structures in pile foundation replacement beam construction technology, specifically, the adhesive properties at the interface between old and new concrete.* *bond slippage between the new and old concrete contact surfaces of pile foundation underpinning beam structures has become the key to limiting the use of underpinning construction technology in large-scale projects due to insufficient anchoring technology and bond material limitations. Fortunately, the development of polymer composite reinforcing adhesive anchoring technology for pile foundation underpinning has created new ideas. Epoxy resin reinforcing adhesive of planting rebar as a commonly used composite building structural adhesive materials, with excellent adhesive properties, chemical stability, and strong heat resistance, has attracted scholars in various fields of research [31-32], while also adding a variety of new polymers of composite epoxy resin materials and new epoxy resins with specific properties have also appeared one after another, such as the novel in-situ polytriazolesulfone modified epoxy and the epoxy resin modified with biodegradable polymer [33-35]. Liu et al. [36] pointed out that cracks in building structure adhesives can be self-healed in various ways and proposed a new epoxy with self-repairing properties for environment-friendly building structure adhesives, which is helpful to the prolongation of the reinforcing adhesive of planting rebar’s working life in complex climatic and engineering environments and also opens the door to the future application of a new type of the reinforcing adhesive of planting rebar to pile foundation underpinning technology. He et al. [37] conducted a study on the mechanical properties of a new epoxy resin reinforcing adhesive for planting reinforcement in highway engineering and discovered that the use of a new composite material can not only greatly improve bond strength between structures but also greatly improve over-all structural load-bearing performance. Gou et al. [6] proposed five different beam-column joint forms and demonstrated that the combination of “tongue and groove + anchor bar + prestressed force” can effectively guarantee the safety of beam-column joints. That provides a valuable reference for the combination of the new type of epoxy resin reinforcing adhesive and reinforcing bar construction technology. It can be seen that the epoxy resin reinforcing adhesive composite material has the high bonding characteristics that traditional planting reinforcement construction requires. Now, the epoxy resin composite material has been widely used in various fields with a good research foundation and technical reserve, which is beneficial to the realization of pile foundation underpinning technology in the complex project, and it is worth introducing into the attempts. However, aiming at reinforcing adhesives excel-lent material performance, it must be combined with reasonable planting reinforcement construction technology, such as the rough interface - prestressing - planting re-bar - reinforcing adhesive construction technology methods, such as joints with a rough interface + planting reinforcement + prestressing + epoxy resin reinforcing adhesive of planting rebar connections.*

3. Section 1: ‘The geometric similarity ratio of the model was chosen as 1/6 when combined with the test demand and test circumstances.’ Please give specific explanations and references.

**Response 3:**

**Thank you for your valuable advice. In order to investigate the load-bearing capacity and stability of the pile foundation replacement beam system and the replacement beam nodes under the upper replacement loads, this study designed and fabricated experimental models. The prototype dimensions of the existing pier columns, existing platform, and replacement beams were 2.50m×1.3m, 6.5m×6.5m×2.0m and 20.3m×8.7cm×3.5m, respectively. Considering the dimensions of the test setup and the size of the upper and lower pressure plates on the loading equipment, as well as adhering to principles of economic feasibility and reliability in experimental design, the length similarity ratio for the experimental models was set at 1:6. This resulted in the dimensions of the test specimens for the existing pier columns, existing platform, and replacement beams being 0.4167m×0.2167m, 1.0833m×1.0833m×0.3333m and 3.38m×1.45m×0.5833m, respectively.**

4. Page 4, please rephrase the first paragraph.

**Response 4:**

**Thanks for your valuable comments, we have rephrased the first paragraph of Page 4. We explained why epoxy resin adhesive was used and provided a table of material performance parameters.**

**The additional contents in the revised manuscript are as follows:**

**For paragraph 2 of section 2.3, add green mark content. (Page 7 lines 239-250)**

*The novel planting reinforcement anchoring method "joints with rough interface + planting reinforcement + prestressing + epoxy resin reinforcing adhesive of planting" is used for the interface between old and new concrete of underpinning beam. Epoxy resin as a planting reinforcement of thermosetting Resins, which has excel-lent mechanical properties, adhesion, and chemical stability, as well as low material shrinkage and a low cost of preparation, and is widely used in construction, adhesives, composites, and other fields. Therefore, the planting reinforcement anchoring technique employs epoxy resin glue as the adhesive of planting reinforcement and concrete. The material properties of epoxy resin are shown in Table 4.*

5. It makes more sense to introduce the design of the model first and then the material properties.

**Response 5:**

**Thank you very much for your valuable feedback. After revisiting the overall structure of the paper, we have found that reordering the sections to first discuss model design and then explore material properties enhances the logical flow of the article. Therefore, we have adjusted Sections 2.2 and 2.3 to be titled as follows: "2.2 Model Design and Construction" and "2.3 Model Materials." Additionally, we have made corresponding changes to the figure and table numbering as shown below.**

**For section 2.2 and 2.3 of capture 2. (page 5-7, lines 219-250)**

*2.2 Model Design and Construction*

The similarity ratio was used to determine the dimensional correspondence between the model and prototype structures, as shown in Table 2 below. Figure 1 illustrates the intended model structure. The joints with rough interface, planting reinforcement, pre-stressing, and construction adhesive were applied to manufacture the model depicted in Fig. 2 according to the structure design drawing.

**Table 2.** Material properties of epoxy resin anchoring adhesive for planting reinforcement

| **Items** | | **Prototype (cm)** | **Model (cm)** |
| --- | --- | --- | --- |
| Piers | Length | 250 | 41.67 |
| Width | 130 | 21.67 |
| Abutment | Length | 650 | 108.33 |
| Width | 650 | 108.33 |
| Height | 200 | 33.33 |
| Underpinning beam | Length | 2030 | 338 |
| Width | 870 | 145 |
| Height | 350 | 58.33 |

|  |  |
| --- | --- |
| (**a**)Elevation drawing. | (**b**) Plane graphs. |

**Figure 1.** Model design drawing.

| **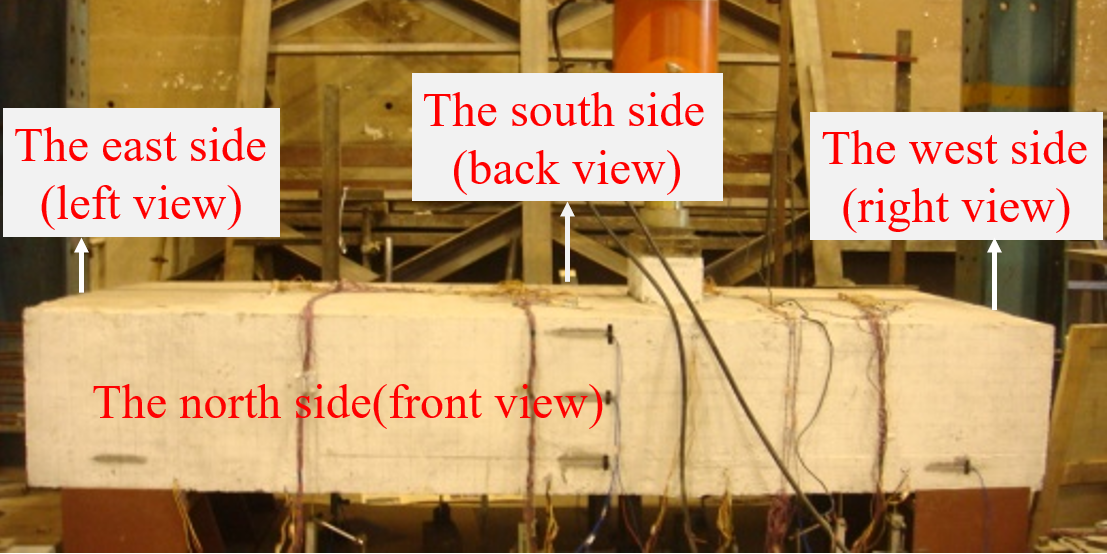** |
| --- |

**Figure 2.** Model physical drawing.

*2.3. Model Materials*

The materials used for the underpinning beam model are the same as those used for the prototype construction. The concrete strength grade is C50, and the major reinforcement in the compression and tension zones of the underpinning beam is HRB400, while the other bars are HRB335 reinforcement. The underpinning beam's longitudinal prestressed tendons are made of high-strength, low-relaxation steel strands with a standard tensile strength of *fpk = 1860*Mpa and a nominal diameter of *15.2*mm. The results of material tests are displayed in the table below.

**Table 3.** Mechanical properties of steel and concrete.

| **Type** | **Physical Quantities** | **Yield strength**  **（Mpa)** | **Ultimate tensile strength（Mpa)** | **Extensibility** |
| --- | --- | --- | --- | --- |
| Reinforcement | Major reinforcement of the underpinning beam | 396.33 | 548.33 | 6.5 |
| Other bars | 346 | 463 | 6.1 |
| Prestressed tendons | -- | 1877 | 1.75 |
| Concrete | Underpinning beam  (The second pouring) | 53.41 | | |

Epoxy resin as a planting reinforcement of thermosetting Resins, which has excellent mechanical properties, adhesion, and chemical stability, as well as low material shrinkage and a low cost of preparation, and is widely used in construction, adhesives, composites, and other fields. The material properties of epoxy resin are shown in Table 4.

**Table 4.** Material properties of epoxy resin anchoring adhesive for planting reinforcement

|  | **Thermal Distortion Temperature (℃)** | **Fracture elongation**  **(%)** | **Thermal expansion coefficient**  **(10-5m/(m•℃)** | **Tensile strength**  **(Mpa)** | **Compressive strength**  **(Mpa)** |
| --- | --- | --- | --- | --- | --- |
| Epoxy | 46-288 | 3-6 | 4.5-6.5 | 28-91 | 105-175 |

The following is the construction process for planting reinforcement between the new pouring concrete and the existing concrete interface for the pile foundation underpinning beam structure: measuring the holes for planting rebar installation, drilling and cleaning holes, filling the epoxy resin anchoring adhesive of planting reinforcement, installing the planting rebar and maintaining, as shown in Figure 3.

| 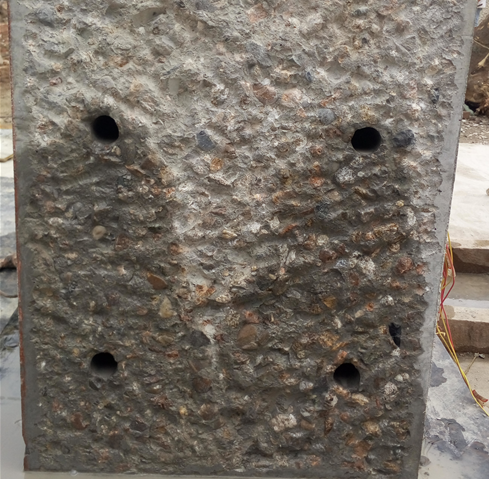 | 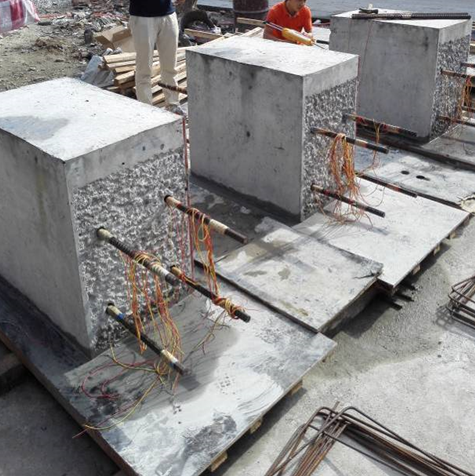 |
| --- | --- |
| (**a**)Positioning, Drilling and Clearing. | (**b**) Pouring Glue and Installing Rebar. |

**Figure 3.** Construction process of planting reinforcement.

6. Use a table to illustrate the specific loading conditions applied.

**Response 6:**

**Thank you for your comment. We have added a table to show the specific loading conditions of this study.** **The additional Table 5 in the revised manuscript is as follows:**

**Section 2.4 of capture 2. (Page 8 lines 275)**

Table 5. Loading protocol

|  | Preloading | Loading | |
| --- | --- | --- | --- |
| Loading protocol | 0-100kN | 100kN-1900kN | 1900kN-2700kN |
| Loop loading twice | Loading step with 150kN | Loading step with 100kN |
| loading level | L0 | L0-L12 | L12-L20 |

7. The red line in figure 8 should not be referred to as ‘simulation’!

**Response 7:**

**We thank the reviewer for raising this valuable comment. We have revised the name of two curve in the manuscript. The modified green contents as follows:**

**Section 3.2of capture 3, section 3.2. (Page 10 lines 332)**

|  |
| --- |

**Figure 8.** Load displacement Curve underpinning beam.

8. The modeling characteristics of the finite element analysis approach (including boundary settings, constitutive models employed for materials and interface parameters) should be acknowledged! Discussing the assumptions made during modeling and their potential impact on the results would provide a more balanced view of the study's validity.

**Response 8:**

**Thank you for pointing out this important issue. We have added modeling characteristics of the finite element analysis approach in the revised manuscript.**

**The additions in the revised manuscript are as the following:**

**For paragraph 1 of section 4.1, add green mark content. (Page 11 lines 352-364)**

*Firstly, concrete elements are modeled using C3D20R solid elements, while steel reinforcement, post-tensioned tendons, and prestressed tendons are simulated using T3D2 truss elements. The connection between steel reinforcement and concrete is modeled with "embedded" constraints, and the interface between old and new concrete are treated as hard contacts. The interaction between the existing platform and replacement beam is simulated using tie constraints to maintain deformation coordination between the two.*

*Secondly, Concrete materials are characterized using a plastic damage constitutive model, which not only captures the differences in tensile and compressive behaviors of concrete materials but also exhibits good convergence properties, making it suitable for describing the deformation characteristics of concrete materials under cyclic loading conditions.*

*Thirdly, Steel reinforcement is represented using a bilinear elastic-plastic constitutive model.*

9. Page 8, Figure 11. How was the explanation for the difference between experimental and numerical results reached without the introduction of the constitutive models?

**Response 9:**

**Thank you for your treasured comments, Figure 11 depicts the deformation value produced from the finite element analysis of the underpinning beam structure under the action of the underpinning load, which is compared with the test value in this condition to validate the efficacy of the finite element analysis.**

**The additions in the revised manuscript are as the following:**

**For paragraph 1 of 4.2, add green mark content. (Page 12 lines 376-384)**

*This paper conducts a finite element simulation analysis of the underpinning structure and plotted the corresponding displacement curves under underpinning load in Fig. 11 for easy comparison and analysis with the experimental results (Fig. 8) in order to study the load-bearing performance of the underpinning structure with the new reinforcement technology.*

10. Figure 12. Use ‘Displacement contour plot’ or ‘Displacement nephogram’

**Response 10:**

**Thank you very much for your valuable suggestions. Upon careful reconsideration based on your feedback, we have determined that 'Displacement contour plot' more clearly conveys the meaning of Figure 12. Therefore, we have updated the title of Figure 12 to "Displacement Contour Plot." The modified green contents as follows:**

**Section 4.3 (Page 13 lines 402)**

| **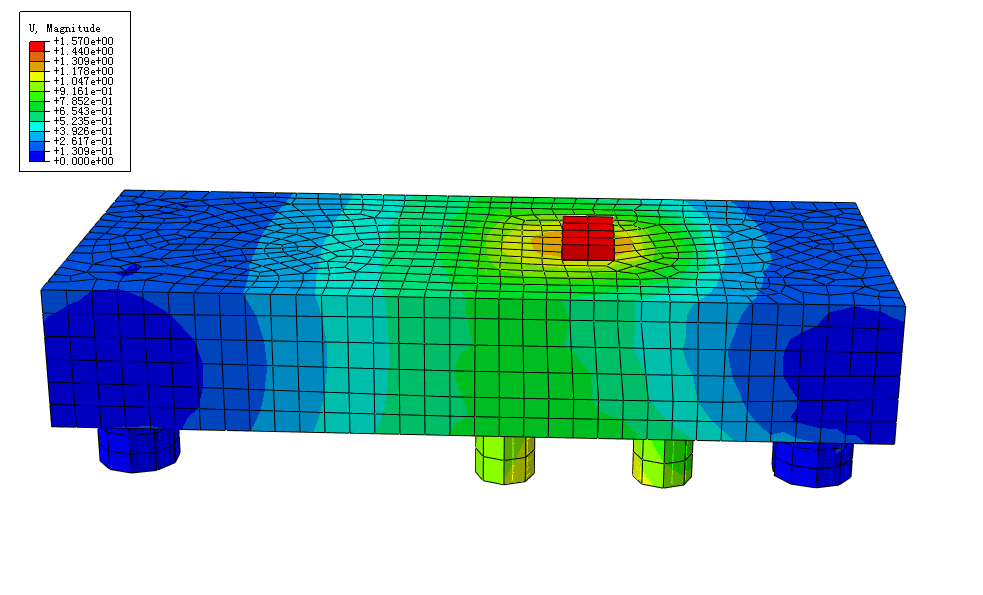** |
| --- |

***Figure 12.*** *Displacement contour plot.*

11. Elaborate on the implications of the observed deformation characteristics and their potential impact on the structural integrity would add depth to the analysis.

**Response 11:**

**Thank you for your valuable suggestions for our work. According to your suggestion that elaborate on the implications of the observed deformation characteristics and their potential impact on the structural integrity would add depth to the analysis, we have also provided supplement in revised manuscript.**

**The additions in the revised manuscript are as the following:**

**For paragraph 1 of 3.2, add green mark content. (Page 10 lines 307-331)**

*When the load on the displacement beam ranged from 0kN to -1900kN, the behavior of the underpinning beam exhibited linear elastic deformation. As the load continued to increase, a turning point appeared in the load-displacement curve with a decrease in the curve's slope. When the load reached the maximum design load of 2750kN during the test, a peak appeared in the curve, indicating that the specimen was approaching failure. The phase from the turning point in the curve to reaching the ultimate load represented the plastic deformation stage of the underpinning beam. Afterward, as the load continued to increase, cracks in the specimen rapidly developed and propagated until failure occurred.*

*The load-displacement curve for the transfer beam under transfer loads is similar to the deformation curve of the steel reinforcement. This similarity is attributed to the optimized bonding performance of the new planning rebar anchoring technology at the interface between old and new concrete in the underpinning beam. This optimization overcomes the weak points in the underpinning structural system, enhances the deformation performance of concrete, and thus allows the steel reinforcement to play a primary controlling role in the deformation of the underpinning structural system.*

12. The study's focus on an urban overpass underpinning project is relevant, but its broader significance to other construction scenarios should be explicitly discussed. How applicable are the proposed construction methods and the insights gained from this specific project to different contexts?

**Response 12:**

**Thanks for raising this valuable issue, In the context of the novel reinforcement anchoring technique proposed in this paper, which involves chiseling - prestressed reinforcement - epoxy resin bonding, and its application to enhance the shear performance of the interface between old and new concrete at replacement beam nodes, the significance of this research extends beyond addressing the construction study of pile foundation replacement beams in the context of the urban overpass bridge project that served as its basis. It also offers valuable insights for other engineering projects that employ pile foundation replacement technology and involve issues related to the bond strength at the interface between old and new concrete, such as secondary casting, crack repair in structures, and engineering reinforcement.**

13. Limitations of the proposed method should be given.

**Response 13:**

**Thank you for your helpful and valuable suggestions for our work. After careful consideration, we found that the limitations of this paper were mainly in the following two areas:**

**(1) Dynamic Testing: Dynamic experiments on the replacement beam model were not conducted, which prevents an accurate assessment of the impact of dynamic loads such as earthquakes on the new anchoring technology. While this study increased the actual replacement loads to determine the maximum experimental design load, considering the influence of dynamic loads, to ensure the structure's sufficient load-bearing capacity under dynamic loads such as impacts, dynamic tests were not conducted due to various factors, including experimental constraints. Therefore, it was not possible to realistically simulate the effects of dynamic loads like earthquakes on the new anchoring technology.**

**(2) Observation of Interface Deformation: The real-time deformation process of the interface between old and new concrete at the replacement beam nodes during the test loading was not observable. The boundary between the old and new concrete is situated within the structure. In scaled-down model experiments, only load-deformation relationships for the reinforcement and concrete were obtained through strain gauges and displacement sensors. Consequently, it was not feasible to observe the deformation of the interface between old and new concrete within the structure after the application of the new anchoring technology.**
