# Supplementary material for: Experimental and Numerical investigation on Pile Foundation Underpinning Structure System in Urban Overpass
Source: Preprints.org preprint supplement (doi:10.20944/preprints202309.0900.v1), 2023-09-14
Supplement: Supplementary file 2 [file 3.Response toAcademic Editor Comments.doc]

Response to Academic Editor Comments

Dear academic editor,

Thanks very much for taking the time to review this manuscript. We really appreciate all your comments and suggestions! Our responses to comments are given in a different color (red), and the added contents in the manuscript in green. We would also like to thank you for allowing us to resubmit a revised version of the manuscript. Please kindly find our itemized point-to-point responses below.

**Point1:** The organization of the study and its presentation have many drawbacks. First of all the study concerns mainly reinforced concrete topics and foundation underpinning is not present. No data are available on soil, piles, or expected soil structure interaction.

**Response 1:**

**We thank the academic editor for raising this critical issue.** **This research is based on the phenomenon of inadequate bonding at the interface between old and new concrete in the pile foundation underpinning beam structure of urban overpasses. We have developed a novel rebar anchoring technique, namely " chiseling + rebar planting + prestressing + epoxy resin rebar adhesive.” Therefore, the focus of this study is on the underpinning beam, not the pile foundation. Furthermore, the interface between old and new concrete, being a structural weak point located within the underpinning beam, makes the underpinning beam a vulnerable component in the entire pile foundation underpinning beam structural system. Ensuring sufficient load-bearing capacity and safety of the underpinning beam component is critical for the overall safety of pile foundation underpinning beam structural system. In this regard, we designed a scaled-down experimental model of the underpinning beam using the novel rebar anchoring technique and established a finite element simulation analysis model. By observing the changes in cracks, displacements, and stress-strain patterns in the underpinning beam under the action of underpinning loads, we analyzed the variations in the structural load-bearing performance. This confirmed that the novel rebar anchoring technique can optimize the bonding performance at the old-new concrete interface, enhance the structural load-bearing capacity, and ensure the safety of the entire pile foundation underpinning beam structural system. This research lays the foundation for the application of the novel rebar anchoring technique in pile foundation underpinning beam construction in similar engineering projects.**

**Point2:** The text is very bad and sometimes even unreadable and not understandable. Many words are used in the wrong sense (see "plantation" and "planting" in the Oxford Dictionary, the correct words are fasteners, connectors, etc...). The summary is crazy in its setup.

**Response 2:**

**Thank you for pointing out this deficiency. After careful verification, we have improved the overall translation quality of the entire document. For example, we have modified” underpinning” to” replacement”, replacing “pile foundation underpinning structure system” with” pile foundation replacement structure system”. Meanwhile, we also revised "plantation bars" and "planting bars " into "planting bars ", such as new and old concrete interfaces with planning bars.**

**Point3:** In Figure 4 it is not clear if the new concrete block extends even below the existing one, and I ask myself how could be grouted the concrete under the existing block if it is sustaining a bridge. The caption of Table 4 is wrong. It is not clear if the model contains prestressing tendons too. It is not clear if the piles of the existing block are removed after the underpinning. No information is given on the reinforcement present in the underpinning block.

**Response 3:**

**We thank the academic editor for raising this critical issue. We have clearly explained the pile foundation replacement beam structural system and planting reinforcement anchoring method involving chiseling - prestressed reinforcement - epoxy resin bonding in Figure 2 (the new order is Figure 1) and Figure 4.**

**The revised Figure2 (the new order is Figure 1) as shown in capture 2.2, page 6, lines 227.**

**The added contents with green contents are as follows: Paragraph 2 of capture 2.4, page 8, lines 285-288.**

**The design of nodes in the replacement beams is a critical aspect of the pile foundation replacement structure design. Establishing a rational method for connecting nodes between replacement beams is a robust assurance of the replacement system's load-bearing capacity and deformation requirements. Addressing the interface between old and new concrete at replacement beam nodes, this paper employs a connection method involving chiseling - prestressed reinforcement - epoxy resin bonding to resist shear damage at the interface under displacement loads. The shear resistance at the interface between old and new concrete at displacement beam nodes is achieved through three components: chiseling to enhance the interlocking and bonding of old and new concrete, prestressed reinforcement providing anchoring, and epoxy resin bonding offering enhanced chemical adhesion. To provide a clearer illustration of the reinforcing construction characteristics at the interface of old and new concrete at displacement beam nodes, this paper utilizes Figure 2 to depict the structural configuration of the pile foundation displacement beam system, as shown in (a) Frontal profile view, (b) Top view, and (c) Ⅰ-Ⅰ special node section view.**

*Simultaneously, Figure 4 is employed to vividly present the novel anchoring connection method with (1) chiseling (concrete roughening interface), (2) prestressed reinforcement, and (3) epoxy resin bonding.*

|  | | |
| --- | --- | --- |
| *(****a****)**Profile view.* | | |
|  | |  |
| *(b) Top view.* | *(c) Ⅰ-Ⅰ* | |

***Figure 2.*** *Model design drawing.*

|  |
| --- |

***Figure 4.*** *Layout of measuring points.*

**Point5:** The figures presenting the results are not clear, even if nowadays the non-linear analysis of a 3D concrete structure is carried out ordinarily by several structural programs with very good interfaces which allow a full description of the results.

**Response:**

**Thanks for your valuable comments, we have replaced the low-quality figures in revised manuscript**
